# Supplementary material
Source: HighWire-hosted journal article supplement (https://bmjopen.bmj.com/content/7/12/e018647)
Supplement: inline-supplementary-material-2 [file inline-supplementary-material-2.pdf]

## Appendix 1: The members of the multi-stakeholder task force

| Name                 | Affiliation                                 | Country            |
|----------------------|---------------------------------------------|--------------------|
| ARIYO Chris          | CSC; EUDAT project                          | Finland            |
| BANZI Rita*          | Istituto Mario Negri                        | Italy              |
| BATTAGLIA Serena*    | ECRIN, Paris                                | France             |
| BECNEL Lauren        | CDISC                                       | USA                |
| BIERER Barbara       | MRCT Center of BWH and Harvard/ Vivli, Inc. | USA                |
| BOWERS Sarion        | Wellcome Trust Sanger Institute             | UK                 |
| CANHAM Steve*        | Independent consultant                      | UK                 |
| CLIVIO Luca          | Istituto Mario Negri                        | Italy              |
| DEMOTES Jacques*     | ECRIN, Paris                                | France             |
| DIAS Monica          | EMA                                         | UK                 |
| DRUML Christiane     | Medical University of Vienna                | Austria            |
| FAURE H el ene       | BioMed Central (ISRCTN registry)            | UK                 |
| FENNER Martin        | DataCite                                    | Germany            |
| GALVEZ Jose          | NIH/NCI                                     | USA                |
| GHERSI Davina        | NHMRC                                       | Australia          |
| GLUUD Christian      | Copenhagen Trial Unit                       | Denmark            |
| GROVES Trish         | BMJ                                         | UK                 |
| HOUSTON Paul         | CDISC                                       | UK                 |
| KARAM Ghassan        | WHO                                         | Switzerland        |
| KARLA Dipak          | EuroRec Institute; EHR4CR project           | Belgium            |
| KNOWLES Rachel       | MRC                                         | UK                 |
| KRLEZA-JERIC Karmela | Ottawa group and IMPACT                     | Canada and Croatia |
| KUBIAK Christine     | ECRIN, Paris                                | France             |
| KUCHINKE Wolfgang    | CRI, Heinrich Heine University              | Germany            |
| KUSH Rebecca         | Formerly CDISC, now Catalysis               | USA                |
| LUKKARINEN Ari       | CSC; EUDAT project                          | Finland            |
| MATEI Mihaela*       | ECRIN, Paris                                | France             |
| MARQUES Pedro        | EATG                                        | Portugal           |
| NEWBIGGING Andrew    | MDSOL/TrialGrid                             | UK                 |
| O'CALLAGHAN Jennifer | Wellcome Trust                              | UK                 |
| OHMANN Christian*    | ECRIN, D usseldorf                          | Germany            |
| RAVAUD Philippe      | CRESS; EQUATOR project                      | France             |
| SCHL UNDER Irene     | BBMRI-ERIC; TMF                             | Germany            |
| SHANAHAN Daniel      | BioMed Central Ltd                          | UK                 |
| SITTER Helmut        | Phillips University, Marburg                | Germany            |
| SPALDING Dylan       | EMBL-EBI                                    | UK                 |
| TUDUR SMITH Catrin   | University of Liverpool                     | UK                 |
| VAN REUSEL Peter     | CDISC                                       | Belgium            |
| VAN VEEN Evert-Ben   | Med Law consult                             | The Netherlands    |
| VISSER Gerben Rienk  | Trial Data Solutions                        | The Netherlands    |
| WILSON Julia         | Global Alliance for Genomics and Health     | UK                 |

\*core group.

Task Force Facilitator: Helmut Sitter (Philipps University, Marburg)

Observers from Japan: Kiyoteru Takenouchi (Translational Research Informatics Center, Kobe) and Daisaku Nakatani (Department of Medical innovation, Osaka University Hospital) joined the multi-stakeholder taskforce for the final consensus meeting.
